# Supplementary material
Source: PubMed Central journal article supplement (PMC3404301)
Supplement: supp_me.2011-1305v1_ME-11-1305_supplemental_data.pdf [file supp_me.2011-1305v1_ME-11-1305_supplemental_data.pdf]

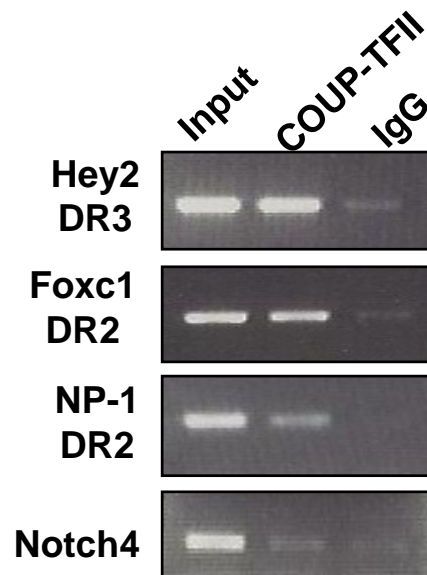

**Supplemental Fig.1 ChIP analysis of COUP-TFII binding to Hey2, Foxc1, Np-1 and Notch 4 promoters in 293T cells.** COUP-TFII binds to the region containing conserved DR3 binding site in the Hey2 promoter and DR2 binding site in the Foxc1 and Np-1 promoters in 293T cells. However, it does not bind to Notch 4 promoter in 293T cells.

**Supplemental figure1**

**Supplemental Table 1: Primers used for qRT-PCR**

|                  | Forward Primer               | Reverse Primer               |
|------------------|------------------------------|------------------------------|
| <b>18sRNA</b>    | 5'-TCCGATAACGAACGAGACTC-3'   | 5'-CAGGGACTTAATCAACGCAA-3'   |
| <b>COUP-TFII</b> | 5'-GCAAGTGGAGAAGCTCAAGG-3'   | 5'-TCCACATGGGCTACATCAGA-3'   |
| <b>E2F1</b>      | 5'-ACAGATCCCAGCCAGTCTCTAC-3' | 5'-GAGAAGTCTCCCGCACAT-3'     |
| <b>CCNE1</b>     | 5'-GCAGTATCCCCAGCAAATCT-3'   | 5'-ATGATACAAGGCCGAAGCAG-3'   |
| <b>CCNE2</b>     | 5'-GCCTTGCGCCATTTTACCTC-3'   | 5'-CATTGACAAAAGGTACCATCCA-3' |
| <b>CCNA2</b>     | 5'-CTGCTGCTATGCTGTTAGCC-3'   | 5'-AGGCTGCTGATGCAGAAAGT-3'   |
| <b>CCNB1</b>     | 5'-GCTCTTGGGGACATTGGTAA-3'   | 5'-CACTGGCACCAGCATAGGTA-3'   |
| <b>CCNB2</b>     | 5'-CGACCCTTGCCACTACACTT-3'   | 5'-TCTGAGACAAGCAGGAAGCA-3'   |
| <b>CDC6</b>      | 5'-CCAAAAAGGAAGCTGTCTCG-3'   | 5'-ATAGGTTGTCATCGCCCAGA-3'   |
| <b>CDC25A</b>    | 5'-CGGAGTCGTGTTTGTGTTTG-3'   | 5'-TAGTGACGGTCAGGTTGGTG-3'   |
| <b>SRC-3</b>     | 5'-GAAGGCCAGAGTGACGAAAG-3'   | 5'-AATGCCTGTCCCTGATTGAC-3'   |
| <b>Notch4</b>    | 5'-ATTCCCACTGCCTCCAGACT-3'   | 5'-TTGTGGCAAAGGGAAGAGAC-3'   |
| <b>Foxc1</b>     | 5'-AGCAGCAGAACTTCCACTCGGT-3' | 5'-TCGGCTTTGAGGGTGTGTCA-3'   |
| <b>PSENN</b>     | 5'-TTCCTTGTCAGCCTACAC-3'     | 5'-ATGGTGATCCAGGAGGTGAG-3'   |
| <b>Hey2</b>      | 5'-TTGAGAAGACTTGTGCCAACTG-3' | 5'-GTGCGTCAAAGTAGCCTTTACC-3' |
| <b>Hes1</b>      | 5'-TCAACACGACACCGGATAAA-3'   | 5'-TCAGCTGGCTCAGACTTTCA-3'   |
| <b>Hes2</b>      | 5'-TTTTCCCGAGCATCAATTTTC-3'  | 5'-AAAGCCACAAGCTTCTTGA-3'    |
| <b>NCSTN</b>     | 5'-GCAGCTCGAGGATGGTCTAC-3'   | 5'-TCTGTGTGCATCCAAAGCTC-3'   |
| <b>EphrinB2</b>  | 5'-TGAAAGTTGGACAAGATGCAAG-3' | 5'-TGCTAGAACCTGGATTGGTTT-3'  |
| <b>EphB4</b>     | 5'-CCATCAAAATGGGAAGATACGA-3' | 5'-CCAAGATTTTCTTCTGGTGTCC-3' |
| <b>18sRNA</b>    | 5'-TCCGATAACGAACGAGACTC-3'   | 5'-CAGGGACTTAATCAACGCAA-3'   |
| <b>COUP-TFII</b> | 5'-GCAAGTGGAGAAGCTCAAGG-3'   | 5'-TCCACATGGGCTACATCAGA-3'   |
| <b>E2F1</b>      | 5'-ACAGATCCCAGCCAGTCTCTAC-3' | 5'-GAGAAGTCTCCCGCACAT-3'     |
| <b>CCNE1</b>     | 5'-GCAGTATCCCCAGCAAATCT-3'   | 5'-ATGATACAAGGCCGAAGCAG-3'   |
| <b>CCNE2</b>     | 5'-GCCTTGCGCCATTTTACCTC-3'   | 5'-CATTGACAAAAGGTACCATCCA-3' |
| <b>NP-1</b>      | 5'-TTCAGGGCCATTTCTTTTATC-3'  | 5'-GGAACATTCAGGACCTCTCTG-3'  |
| <b>CD44</b>      | 5'-AAGGTGGAGCAAACACAACC-3'   | 5'-GCTTTTCTTCTGCCACAC-3'     |
| <b>NP-2</b>      | 5'-CAAGTACGATTGGCTGGACA-3'   | 5'-TGTGAAAGGTCAGGGAGAGG-3'   |

**Supplemental Table 2: Primers used for ChIP**

|                        | <b>Forward Primer</b>          | <b>Reverse Primer</b>          |
|------------------------|--------------------------------|--------------------------------|
| <b>E2F1-Sp1</b>        | 5'-CGCGTTAAAGCCAATAGGAA-3'     | 5'-AAAGTCCCGGCCACTTTTAC-3'     |
| <b>E2F1-Neg</b>        | 5'-CTAACTGCTGATGGGGGTGT-3'     | 5'-CAAACAATGGTGGCTGCTA-3'      |
| <b>Hey2-DR3</b>        | 5'-CCCCGAGGCCGCGAAAGTAG-3'     | 5'-CAGTCCTGAGTGTAAGAATAACC-3'  |
| <b>Hey2-Neg</b>        | 5'-AACTGCCGGTAATTATTTCACTGG-3' | 5'-CACATACCCCTCTCCTTTTCTTTC-3' |
| <b>Foxc1-DR2</b>       | 5'-GGTGACGGATGCTCAAAAAGT-3'    | 5'-GAAGGCGGCCAAATAACC-3'       |
| <b>Foxc1-Neg</b>       | 5'-TAGCTGTCAAATGGCCTTCC-3'     | 5'-TGCTTTGGGGTTTCGATTTAGT-3'   |
| <b>NP-1-DR2</b>        | 5'-TCTCCCTGCCCGCCCCTTTTCTT-3'  | 5'-TGCCACCCCACTTCCCACAGC-3'    |
| <b>NP-1-Neg</b>        | 5'-CAGGCAGAGGCGCGGGTGACA-3'    | 5'-TTGGCATGCTGATCTGGGAAGGTA-3' |
| <b>Notch4-Promoter</b> | 5'-GTTGCAGTTCTCTGAGAAGCATC-3'  | 5'-CCAGCCCTGCTGTTTGTGA-3'      |
